# Supplementary material for: Critical size for the β- to α-transformation in tin nanoparticles after lithium insertion and extraction
Source: Royal Society of Chemistry journal article supplement (doi:10.1039/c5ce00148j), 2015-01-01
Supplement: c5ce00148j1.pdf [file c5ce00148j1.pdf]

## Supporting Information

### Critical Size for the $\beta$ - to $\alpha$ -Transformation in Tin Nanoparticles after Lithium Insertion and Extraction

Nikolas Oehl\*, Lennard Hardenberg, Martin Knipper, Joanna Kolny-Olesiak, Jürgen Parisi and Thorsten Plaggenborg

Energy and Semiconductor Research Laboratory, Institute of Physics, Carl-von-Ossietzky Universität, Carl-von-Ossietzky-Str. 9-11, 26129 Oldenburg, Germany

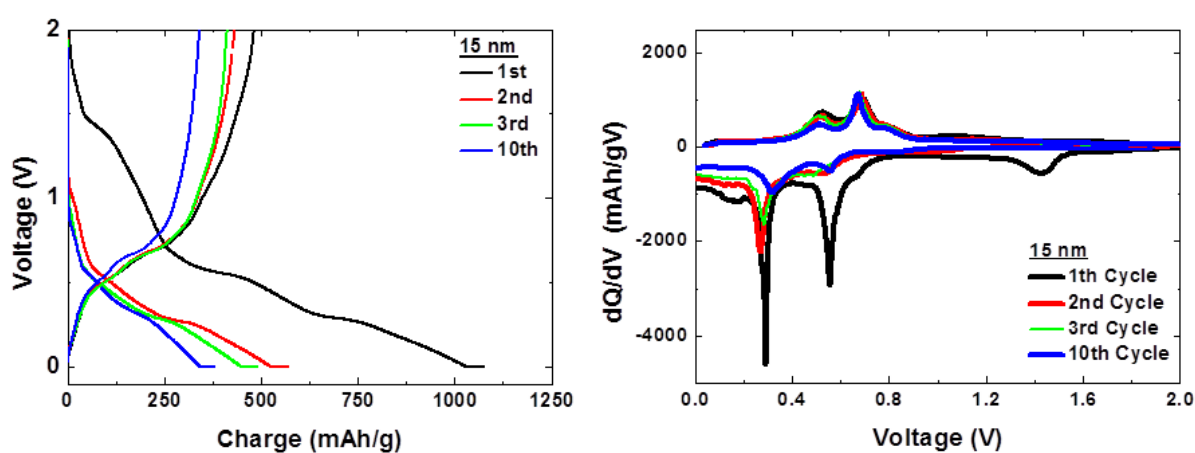

**Figure 1:** Potential vs. specific capacity profiles and corresponding differential capacity plots displaying the 1<sup>st</sup>, 2<sup>nd</sup>, 3<sup>rd</sup> and 10<sup>th</sup> constant-current-constant-voltage charge/discharge cycle of the 15 nm sized nanoparticle electrode.

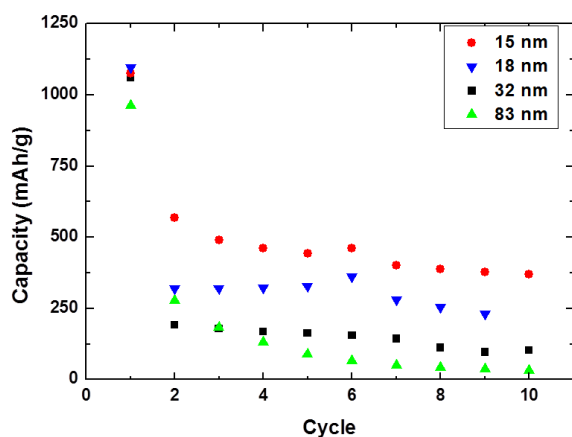

**Figure 2:** Specific lithiation capacity vs. cycle number for the constant-current-constant-potential charge/discharge cycling of some investigated nanoparticle electrodes with different particle sizes. Potential range: 0.005 V to 2 vs. Li/Li<sup>+</sup> (0.05C Rate).
